# Supplementary material for: Xylem Cell Wall Formation in Pioneer Roots and Stems of Populus trichocarpa (Torr. & Gray)
Source: PubMed Central journal article supplement (PMC6861220; doi:10.3389/fpls.2019.01419), 2019-11-12
Supplement: DataSheet_1.pdf [file DataSheet_1.pdf]

## Supplemental Table S1

| GO         | Category         | Term                                                       | Count | %   | P-Value | Benjamini |
|------------|------------------|------------------------------------------------------------|-------|-----|---------|-----------|
| GO:0005975 | GOTERM_BP_DIRECT | carbohydrate metabolic process                             | 29    | 2,1 | 2,9E-2  | 4,8E-1    |
| GO:0071555 | GOTERM_BP_DIRECT | cell wall organization                                     | 27    | 1,9 | 1,6E-8  | 6,3E-6    |
| GO:0051603 | GOTERM_BP_DIRECT | proteolysis involved in cellular protein catabolic process | 16    | 1,2 | 1,7E-5  | 3,3E-3    |
| GO:0046916 | GOTERM_BP_DIRECT | cellular transition metal ion homeostasis                  | 12    | 0,9 | 6,0E-3  | 2,3E-1    |
| GO:0030001 | GOTERM_BP_DIRECT | metal ion transport                                        | 12    | 0,9 | 1,4E-2  | 3,8E-1    |
| GO:0030244 | GOTERM_BP_DIRECT | cellulose biosynthetic process                             | 11    | 0,8 | 7,3E-5  | 7,1E-3    |
| GO:0045490 | GOTERM_BP_DIRECT | pectin catabolic process                                   | 11    | 0,8 | 2,2E-2  | 4,4E-1    |
| GO:0071554 | GOTERM_BP_DIRECT | cell wall organization or biogenesis                       | 10    | 0,7 | 7,1E-4  | 3,9E-2    |
| GO:0030163 | GOTERM_BP_DIRECT | protein catabolic process                                  | 10    | 0,7 | 1,8E-2  | 4,5E-1    |
|            | GOTERM_BP_DIRECT | xyloglucan metabolic process                               | 9     | 0,6 | 8,9E-5  | 6,9E-3    |
|            | GOTERM_BP_DIRECT | cell wall biogenesis                                       | 9     | 0,6 | 1,1E-4  | 7,0E-3    |
|            | GOTERM_BP_DIRECT | auxin-activated signaling pathway                          | 9     | 0,6 | 2,4E-2  | 4,5E-1    |
|            | GOTERM_BP_DIRECT | biosynthetic process                                       | 9     | 0,6 | 5,8E-2  | 6,9E-1    |
|            | GOTERM_BP_DIRECT | plant-type primary cell wall biogenesis                    | 8     | 0,6 | 4,6E-5  | 5,9E-3    |
|            | GOTERM_BP_DIRECT | cell wall modification                                     | 8     | 0,6 | 7,5E-2  | 7,3E-1    |
|            | GOTERM_BP_DIRECT | oxalate metabolic process                                  | 7     | 0,5 | 2,9E-2  | 4,7E-1    |
|            | GOTERM_BP_DIRECT | amino acid transmembrane transport                         | 7     | 0,5 | 9,7E-2  | 7,8E-1    |
|            | GOTERM_BP_DIRECT | cellulose catabolic process                                | 6     | 0,4 | 4,2E-3  | 1,8E-1    |
|            | GOTERM_BP_DIRECT | ribosomal large subunit biogenesis                         | 5     | 0,4 | 5,1E-2  | 6,5E-1    |
|            | GOTERM_BP_DIRECT | glycolytic process                                         | 5     | 0,4 | 6,4E-2  | 7,1E-1    |
|            | GOTERM_BP_DIRECT | cellular amino acid metabolic process                      | 5     | 0,4 | 7,5E-2  | 7,2E-1    |
|            | GOTERM_BP_DIRECT | plant-type secondary cell wall biogenesis                  | 4     | 0,3 | 1,3E-2  | 3,9E-1    |
|            | GOTERM_BP_DIRECT | xylan biosynthetic process                                 | 4     | 0,3 | 1,9E-2  | 4,4E-1    |
|            | GOTERM_BP_DIRECT | rRNA modification                                          | 3     | 0,2 | 2,1E-2  | 4,4E-1    |
|            | GOTERM_BP_DIRECT | response to freezing                                       | 3     | 0,2 | 6,6E-2  | 7,0E-1    |
|            | GOTERM_BP_DIRECT | regulation of response to salt stress                      | 2     | 0,1 | 7,7E-2  | 7,1E-1    |
|            | GOTERM_BP_DIRECT | nitric oxide biosynthetic process                          | 2     | 0,1 | 7,7E-2  | 7,1E-1    |
|            | GOTERM_BP_DIRECT | box H/ACA snoRNA 3'-end processing                         | 2     | 0,1 | 7,7E-2  | 7,1E-1    |

|            |                  |                                                           |     |      |        |        |
|------------|------------------|-----------------------------------------------------------|-----|------|--------|--------|
| GO:0016021 | GOTERM_CC_DIRECT | integral component of membrane                            | 327 | 23,6 | 1,6E-2 | 2,5E-1 |
| GO:0005886 | GOTERM_CC_DIRECT | plasma membrane                                           | 63  | 4,5  | 3,6E-2 | 3,4E-1 |
| GO:0005618 | GOTERM_CC_DIRECT | cell wall                                                 | 35  | 2,5  | 1,8E-7 | 2,2E-5 |
| GO:0016020 | GOTERM_CC_DIRECT | membrane                                                  | 35  | 2,5  | 8,8E-2 | 4,9E-1 |
|            | GOTERM_CC_DIRECT | extracellular region                                      | 32  | 2,3  | 1,1E-5 | 6,7E-4 |
|            | GOTERM_CC_DIRECT | Golgi apparatus                                           | 24  | 1,7  | 1,7E-5 | 6,8E-4 |
|            | GOTERM_CC_DIRECT | plant-type cell wall                                      | 16  | 1,2  | 1,7E-4 | 5,3E-3 |
|            | GOTERM_CC_DIRECT | anchored component of plasma membrane                     | 14  | 1,0  | 5,4E-2 | 3,9E-1 |
|            | GOTERM_CC_DIRECT | apoplast                                                  | 13  | 0,9  | 5,0E-4 | 1,2E-2 |
|            | GOTERM_CC_DIRECT | microtubule                                               | 9   | 0,6  | 4,7E-2 | 3,7E-1 |
|            | GOTERM_CC_DIRECT | cell periphery                                            | 8   | 0,6  | 2,4E-2 | 2,8E-1 |
|            | GOTERM_CC_DIRECT | vacuole                                                   | 8   | 0,6  | 7,4E-2 | 4,7E-1 |
|            | GOTERM_CC_DIRECT | lysosome                                                  | 7   | 0,5  | 9,9E-3 | 1,8E-1 |
|            | GOTERM_CC_DIRECT | small-subunit processome                                  | 7   | 0,5  | 3,6E-2 | 3,6E-1 |
|            | GOTERM_CC_DIRECT | extracellular space                                       | 7   | 0,5  | 4,4E-2 | 3,7E-1 |
|            | GOTERM_CC_DIRECT | phosphopyruvate hydratase complex                         | 3   | 0,2  | 2,0E-2 | 2,7E-1 |
|            | GOTERM_CC_DIRECT | box C/D snoRNP complex                                    | 3   | 0,2  | 7,6E-2 | 4,5E-1 |
| GO:0046872 | GOTERM_MF_DIRECT | metal ion binding                                         | 53  | 3,8  | 2,5E-2 | 5,1E-1 |
| GO:0016787 | GOTERM_MF_DIRECT | hydrolase activity                                        | 22  | 1,6  | 6,1E-2 | 6,2E-1 |
| GO:0005215 | GOTERM_MF_DIRECT | transporter activity                                      | 17  | 1,2  | 6,0E-3 | 2,6E-1 |
| GO:0004553 | GOTERM_MF_DIRECT | hydrolase activity, hydrolyzing O-glycosyl compounds      | 16  | 1,2  | 1,4E-2 | 4,2E-1 |
| GO:0016709 | GOTERM_MF_DIRECT | oxidoreductase activity, acting on paired donors, with in | 14  | 1,0  | 6,7E-2 | 6,1E-1 |
| GO:0046914 | GOTERM_MF_DIRECT | transition metal ion binding                              | 12  | 0,9  | 5,6E-3 | 2,8E-1 |
| GO:0016759 | GOTERM_MF_DIRECT | cellulose synthase activity                               | 10  | 0,7  | 5,7E-7 | 2,0E-4 |
| GO:0016760 | GOTERM_MF_DIRECT | cellulose synthase (UDP-forming) activity                 | 10  | 0,7  | 4,1E-5 | 7,1E-3 |
| GO:0016413 | GOTERM_MF_DIRECT | O-acetyltransferase activity                              | 10  | 0,7  | 5,2E-4 | 4,5E-2 |
|            | GOTERM_MF_DIRECT | xyloglucan:xyloglucosyl transferase activity              | 9   | 0,6  | 1,1E-4 | 1,3E-2 |
|            | GOTERM_MF_DIRECT | serine-type carboxypeptidase activity                     | 9   | 0,6  | 2,3E-3 | 1,5E-1 |
|            | GOTERM_MF_DIRECT | aspartic-type endopeptidase activity                      | 9   | 0,6  | 5,6E-2 | 6,1E-1 |
|            | GOTERM_MF_DIRECT | pectinesterase inhibitor activity                         | 8   | 0,6  | 1,9E-2 | 4,9E-1 |
|            | GOTERM_MF_DIRECT | amino acid transmembrane transporter activity             | 8   | 0,6  | 5,2E-2 | 6,3E-1 |
|            | GOTERM_MF_DIRECT | aspartyl esterase activity                                | 8   | 0,6  | 6,7E-2 | 6,2E-1 |

|                  |                                                        |   |     |        |        |
|------------------|--------------------------------------------------------|---|-----|--------|--------|
| GOTERM_MF_DIRECT | oxalate decarboxylase activity                         | 7 | 0,5 | 2,6E-2 | 5,0E-1 |
| GOTERM_MF_DIRECT | cysteine-type endopeptidase activity                   | 7 | 0,5 | 2,8E-2 | 5,0E-1 |
| GOTERM_MF_DIRECT | signal transducer activity                             | 7 | 0,5 | 4,1E-2 | 5,8E-1 |
| GOTERM_MF_DIRECT | manganese ion binding                                  | 7 | 0,5 | 5,0E-2 | 6,3E-1 |
| GOTERM_MF_DIRECT | nutrient reservoir activity                            | 7 | 0,5 | 7,6E-2 | 6,1E-1 |
| GOTERM_MF_DIRECT | cellulase activity                                     | 6 | 0,4 | 7,7E-3 | 2,8E-1 |
| GOTERM_MF_DIRECT | calcium-dependent phospholipid binding                 | 6 | 0,4 | 3,2E-2 | 5,3E-1 |
| GOTERM_MF_DIRECT | beta-glucosidase activity                              | 6 | 0,4 | 8,6E-2 | 6,5E-1 |
| GOTERM_MF_DIRECT | microtubule binding                                    | 5 | 0,4 | 5,5E-2 | 6,3E-1 |
| GOTERM_MF_DIRECT | alpha-L-arabinofuranosidase activity                   | 4 | 0,3 | 3,4E-2 | 5,2E-1 |
| GOTERM_MF_DIRECT | transaminase activity                                  | 4 | 0,3 | 6,1E-2 | 6,3E-1 |
| GOTERM_MF_DIRECT | phosphopyruvate hydratase activity                     | 3 | 0,2 | 2,0E-2 | 4,6E-1 |
| GOTERM_MF_DIRECT | pectin acetylerase activity                            | 3 | 0,2 | 6,3E-2 | 6,1E-1 |
| GOTERM_MF_DIRECT | malate dehydrogenase (decarboxylating) (NAD+) activity | 3 | 0,2 | 7,4E-2 | 6,3E-1 |
| GOTERM_MF_DIRECT | xylan 1,4-beta-xylosidase activity                     | 3 | 0,2 | 9,7E-2 | 6,8E-1 |
| GOTERM_MF_DIRECT | molybdopterin cofactor binding                         | 2 | 0,1 | 7,5E-2 | 6,2E-1 |
| GOTERM_MF_DIRECT | nitrate reductase (NADH) activity                      | 2 | 0,1 | 7,5E-2 | 6,2E-1 |

## Supplemental Table S2

| GO         | Category         | Term                                              | Count | %   | P-Value | Benjamini |
|------------|------------------|---------------------------------------------------|-------|-----|---------|-----------|
| GO:0006355 | GOTERM_BP_DIRECT | regulation of transcription, DNA-templated        | 36    | 4,0 | 6,2E-2  | 8,4E-1    |
| GO:0005975 | GOTERM_BP_DIRECT | carbohydrate metabolic process                    | 22    | 2,5 | 1,4E-2  | 7,8E-1    |
| GO:0052696 | GOTERM_BP_DIRECT | flavonoid glucuronidation                         | 12    | 1,3 | 3,2E-2  | 8,7E-1    |
| GO:0009813 | GOTERM_BP_DIRECT | flavonoid biosynthetic process                    | 12    | 1,3 | 4,0E-2  | 8,8E-1    |
| GO:0015979 | GOTERM_BP_DIRECT | photosynthesis                                    | 10    | 1,1 | 2,0E-3  | 4,6E-1    |
| GO:0055085 | GOTERM_BP_DIRECT | transmembrane transport                           | 10    | 1,1 | 4,9E-2  | 8,6E-1    |
| GO:0006855 | GOTERM_BP_DIRECT | drug transmembrane transport                      | 8     | 0,9 | 4,5E-3  | 5,1E-1    |
| GO:0009416 | GOTERM_BP_DIRECT | response to light stimulus                        | 5     | 0,6 | 5,4E-2  | 8,6E-1    |
|            | GOTERM_BP_DIRECT | response to biotic stimulus                       | 5     | 0,6 | 8,3E-2  | 8,8E-1    |
| GO:0009768 | GOTERM_BP_DIRECT | photosynthesis, light harvesting in photosystem I | 4     | 0,4 | 2,0E-2  | 7,9E-1    |
|            | GOTERM_BP_DIRECT | chaperone-mediated protein folding                | 4     | 0,4 | 5,5E-2  | 8,3E-1    |
|            | GOTERM_BP_DIRECT | protein-chromophore linkage                       | 4     | 0,4 | 8,1E-2  | 8,9E-1    |
|            | GOTERM_BP_DIRECT | base-excision repair                              | 4     | 0,4 | 8,6E-2  | 8,7E-1    |
|            | GOTERM_BP_DIRECT | suberin biosynthetic process                      | 3     | 0,3 | 4,2E-2  | 8,5E-1    |
|            | GOTERM_BP_DIRECT | long-chain fatty-acyl-CoA metabolic process       | 3     | 0,3 | 4,2E-2  | 8,5E-1    |
| GO:0005634 | GOTERM_CC_DIRECT | nucleus                                           | 85    | 9,5 | 2,7E-2  | 3,5E-1    |
| GO:0043231 | GOTERM_CC_DIRECT | intracellular membrane-bounded organelle          | 16    | 1,8 | 1,8E-2  | 3,3E-1    |
| GO:0005840 | GOTERM_CC_DIRECT | ribosome                                          | 10    | 1,1 | 1,3E-2  | 4,5E-1    |
|            | GOTERM_CC_DIRECT | photosystem I                                     | 7     | 0,8 | 9,8E-4  | 8,6E-2    |
|            | GOTERM_CC_DIRECT | chloroplast envelope                              | 6     | 0,7 | 7,4E-2  | 6,3E-1    |
|            | GOTERM_CC_DIRECT | photosystem II                                    | 5     | 0,6 | 2,3E-2  | 3,4E-1    |
|            | GOTERM_CC_DIRECT | plastoglobule                                     | 4     | 0,4 | 8,9E-2  | 6,1E-1    |
|            | GOTERM_CC_DIRECT | photosystem I reaction center                     | 3     | 0,3 | 1,5E-2  | 3,8E-1    |
|            | GOTERM_CC_DIRECT | chloroplast outer membrane                        | 3     | 0,3 | 7,8E-2  | 6,1E-1    |
| GO:0003677 | GOTERM_MF_DIRECT | DNA binding                                       | 77    | 8,6 | 1,3E-6  | 3,4E-4    |
| GO:0046872 | GOTERM_MF_DIRECT | metal ion binding                                 | 36    | 4,0 | 5,4E-2  | 6,8E-1    |

|            |                  |                                                             |    |     |        |        |
|------------|------------------|-------------------------------------------------------------|----|-----|--------|--------|
| GO:0043565 | GOTERM_MF_DIRECT | sequence-specific DNA binding                               | 19 | 2,1 | 8,1E-2 | 7,3E-1 |
| GO:0080044 | GOTERM_MF_DIRECT | quercetin 7-O-glucosyltransferase activity                  | 11 | 1,2 | 3,6E-2 | 7,0E-1 |
| GO:0080043 | GOTERM_MF_DIRECT | quercetin 3-O-glucosyltransferase activity                  | 11 | 1,2 | 3,6E-2 | 7,0E-1 |
| GO:0015297 | GOTERM_MF_DIRECT | antiporter activity                                         | 10 | 1,1 | 1,6E-3 | 1,9E-1 |
| GO:0042626 | GOTERM_MF_DIRECT | ATPase activity, coupled to transmembrane movement of       | 10 | 1,1 | 2,5E-2 | 6,8E-1 |
|            | GOTERM_MF_DIRECT | serine-type endopeptidase activity                          | 9  | 1,0 | 6,5E-2 | 7,2E-1 |
|            | GOTERM_MF_DIRECT | drug transmembrane transporter activity                     | 8  | 0,9 | 4,5E-3 | 3,3E-1 |
|            | GOTERM_MF_DIRECT | dioxygenase activity                                        | 8  | 0,9 | 4,4E-2 | 6,9E-1 |
|            | GOTERM_MF_DIRECT | peptidyl-prolyl cis-trans isomerase activity                | 7  | 0,8 | 2,5E-2 | 7,3E-1 |
|            | GOTERM_MF_DIRECT | transcriptional activator activity, RNA polymerase II trans | 6  | 0,7 | 7,3E-2 | 7,4E-1 |
|            | GOTERM_MF_DIRECT | amino acid transmembrane transporter activity               | 6  | 0,7 | 7,6E-2 | 7,3E-1 |
|            | GOTERM_MF_DIRECT | core promoter sequence-specific DNA binding                 | 5  | 0,6 | 2,7E-2 | 6,5E-1 |
|            | GOTERM_MF_DIRECT | chlorophyll binding                                         | 5  | 0,6 | 3,8E-2 | 6,8E-1 |
|            | GOTERM_MF_DIRECT | pigment binding                                             | 4  | 0,4 | 2,0E-2 | 7,3E-1 |
|            | GOTERM_MF_DIRECT | FK506 binding                                               | 4  | 0,4 | 5,1E-2 | 6,8E-1 |
|            | GOTERM_MF_DIRECT | fatty-acyl-CoA reductase (alcohol-forming) activity         | 3  | 0,3 | 4,8E-2 | 6,9E-1 |

## Supplemental Table S3

| Analysis Type:                                          | PANTHER<br>Overrepresentation<br>Test (release<br>20160715) |                                       |                                     | Reference list                        | Client Text Box Input                      |                                    |
|---------------------------------------------------------|-------------------------------------------------------------|---------------------------------------|-------------------------------------|---------------------------------------|--------------------------------------------|------------------------------------|
| Annotation Version and<br>Release Date:                 | GO Ontology<br>database Released<br>2017-02-28              | Mapped IDs:                           | 41462 out of 41462                  | 1260 out of 1260                      |                                            |                                    |
| Analyzed List:                                          | Client Text Box<br>Input (Populus<br>trichocarpa)           | Unmapped IDs:                         |                                     | 0                                     | 147                                        |                                    |
| Reference List:                                         | Populus trichocarpa<br>(all genes in<br>database)           | Multiple mapping<br>information:      |                                     | 0                                     | 0                                          |                                    |
| Bonferroni correction:                                  | true                                                        |                                       |                                     |                                       |                                            |                                    |
| Bonferroni count:                                       | 1494                                                        |                                       |                                     |                                       |                                            |                                    |
| <b>GO biological process<br/>complete</b>               | Populus trichocarpa ·<br>REFLIST (41462)                    | Client<br>Text Box<br>Input<br>(1260) | Client Text Box<br>Input (expected) | Client Text Box Input<br>(over/under) | Client Text Box Input<br>(fold Enrichment) | Client Text Box<br>Input (P-value) |
| mRNA transcription<br>(GO:0009299)                      | 20                                                          | 7                                     | 0,61                                | +                                     | 11,52                                      | 5,27E-03                           |
| plant-type primary cell wall<br>biogenesis (GO:0009833) | 29                                                          | 10                                    | 0,88                                | +                                     | 11,35                                      | 5,08E-05                           |
| cytoskeleton-dependent<br>cytokinesis (GO:0061640)      | 31                                                          | 10                                    | 0,94                                | +                                     | 10,61                                      | 9,38E-05                           |

|                                                               |     |    |      |   |       |          |
|---------------------------------------------------------------|-----|----|------|---|-------|----------|
| mitotic cytokinesis<br>(GO:0000281)                           | 31  | 10 | 0,94 | + | 10,61 | 9,38E-05 |
| cytokinesis (GO:0000910)                                      | 43  | 12 | 1,31 | + | 9,18  | 2,23E-05 |
| plant-type cell wall<br>biogenesis (GO:0009832)               | 72  | 15 | 2,19 | + | 6,86  | 1,76E-05 |
| xyloglucan metabolic<br>process (GO:0010411)                  | 53  | 11 | 1,61 | + | 6,83  | 1,58E-03 |
| cell wall biogenesis<br>(GO:0042546)                          | 122 | 25 | 3,71 | + | 6,74  | 3,90E-10 |
| cell wall polysaccharide<br>metabolic process<br>(GO:0010383) | 75  | 13 | 2,28 | + | 5,7   | 1,26E-03 |
| hemicellulose metabolic<br>process (GO:0010410)               | 75  | 13 | 2,28 | + | 5,7   | 1,26E-03 |
| cellulose biosynthetic<br>process (GO:0030244)                | 58  | 10 | 1,76 | + | 5,67  | 2,37E-02 |
| cell division (GO:0051301)                                    | 85  | 13 | 2,58 | + | 5,03  | 4,85E-03 |
| cell wall macromolecule<br>metabolic process<br>(GO:0044036)  | 116 | 17 | 3,53 | + | 4,82  | 2,87E-04 |
| cellulose metabolic process<br>(GO:0030243)                   | 86  | 12 | 2,61 | + | 4,59  | 2,80E-02 |
| cellular glucan metabolic<br>process (GO:0006073)             | 194 | 23 | 5,9  | + | 3,9   | 9,89E-05 |
| cellular polysaccharide<br>metabolic process<br>(GO:0044264)  | 230 | 27 | 6,99 | + | 3,86  | 9,07E-06 |

|                                                              |       |     |        |   |      |          |
|--------------------------------------------------------------|-------|-----|--------|---|------|----------|
| plant-type cell wall organization or biogenesis (GO:0071669) | 168   | 19  | 5,11   | + | 3,72 | 2,62E-03 |
| glucan metabolic process (GO:0044042)                        | 204   | 23  | 6,2    | + | 3,71 | 2,37E-04 |
| cell wall organization or biogenesis (GO:0071554)            | 539   | 60  | 16,38  | + | 3,66 | 6,35E-14 |
| cell wall organization (GO:0071555)                          | 385   | 41  | 11,7   | + | 3,5  | 2,28E-08 |
| external encapsulating structure organization (GO:0045229)   | 388   | 41  | 11,79  | + | 3,48 | 2,87E-08 |
| polysaccharide biosynthetic process (GO:0000271)             | 167   | 17  | 5,08   | + | 3,35 | 3,38E-02 |
| polysaccharide metabolic process (GO:0005976)                | 412   | 41  | 12,52  | + | 3,27 | 1,69E-07 |
| cellular carbohydrate metabolic process (GO:0044262)         | 348   | 34  | 10,58  | + | 3,21 | 9,96E-06 |
| chemical homeostasis (GO:0048878)                            | 375   | 32  | 11,4   | + | 2,81 | 5,36E-04 |
| ion homeostasis (GO:0050801)                                 | 262   | 22  | 7,96   | + | 2,76 | 4,32E-02 |
| carbohydrate metabolic process (GO:0005975)                  | 1187  | 83  | 36,07  | + | 2,3  | 1,01E-08 |
| biological_process (GO:0008150)                              | 20829 | 711 | 632,98 | + | 1,12 | 9,11E-03 |



|                                                                |       |     |        |   |      |          |
|----------------------------------------------------------------|-------|-----|--------|---|------|----------|
| Unclassified (UNCLASSIFIED)                                    | 20633 | 549 | 627,02 | - | 0,88 | 0,00E+00 |
| nucleic acid phosphodiester<br>bond hydrolysis<br>(GO:0090305) | 801   | 6   | 24,34  | - | 0,25 | 1,32E-02 |

## Supplemental Table S4

| Analysis Type:                                                 | PANTHER<br>Overrepresentation<br>Test (release<br>20160715) |                                | Reference list                      | Client Text Box Input                 |                                            |                                    |
|----------------------------------------------------------------|-------------------------------------------------------------|--------------------------------|-------------------------------------|---------------------------------------|--------------------------------------------|------------------------------------|
| Annotation Version and<br>Release Date:                        | GO Ontology database<br>Released 2017-02-28                 |                                | Mapped IDs:                         | 41462 out of 41462                    | 821 out of 821                             |                                    |
| Analyzed List:                                                 | Client Text Box Input<br>(Populus trichocarpa)              |                                | Unmapped IDs:                       | 0                                     | 86                                         |                                    |
| Reference List:                                                | Populus trichocarpa<br>(all genes in database)              |                                | Multiple mapping<br>information:    | 0                                     | 0                                          |                                    |
| Bonferroni correction:                                         | true                                                        |                                |                                     |                                       |                                            |                                    |
| Bonferroni count:                                              | 1494                                                        |                                |                                     |                                       |                                            |                                    |
| <b>GO biological process<br/>complete</b>                      | Populus trichocarpa -<br>REFLIST (41462)                    | Client Text Box Input<br>(821) | Client Text Box<br>Input (expected) | Client Text Box Input<br>(over/under) | Client Text Box Input<br>(fold Enrichment) | Client Text Box Input<br>(P-value) |
| biological_process<br>(GO:0008150)                             | 20829                                                       | 490                            | 412,44                              | +                                     | 1,19                                       | 0,0000509                          |
| cell differentiation<br>(GO:0030154)                           | 293                                                         | 23                             | 5,8                                 | +                                     | 3,96                                       | 0,0000702                          |
| cellular developmental<br>process (GO:0048869)                 | 314                                                         | 23                             | 6,22                                | +                                     | 3,7                                        | 0,000235                           |
| regulation of biosynthetic<br>process (GO:0009889)             | 2654                                                        | 90                             | 52,55                               | +                                     | 1,71                                       | 0,000986                           |
| regulation of cellular<br>biosynthetic process<br>(GO:0031326) | 2654                                                        | 90                             | 52,55                               | +                                     | 1,71                                       | 0,000986                           |

|                                                                                       |      |    |       |   |      |          |
|---------------------------------------------------------------------------------------|------|----|-------|---|------|----------|
| regulation of cellular<br>macromolecule<br>biosynthetic process<br>(GO:2000112)       | 2607 | 90 | 51,62 | + | 1,74 | 0,000468 |
| regulation of cellular<br>metabolic process<br>(GO:0031323)                           | 2881 | 93 | 57,05 | + | 1,63 | 0,00484  |
| regulation of gene<br>expression (GO:0010468)                                         | 2790 | 92 | 55,25 | + | 1,67 | 0,00234  |
| regulation of<br>macromolecule<br>biosynthetic process<br>(GO:0010556)                | 2651 | 90 | 52,49 | + | 1,71 | 0,000941 |
| regulation of<br>macromolecule metabolic<br>process (GO:0060255)                      | 3071 | 96 | 60,81 | + | 1,58 | 0,0121   |
| regulation of metabolic<br>process (GO:0019222)                                       | 3103 | 96 | 61,44 | + | 1,56 | 0,0182   |
| regulation of nitrogen<br>compound metabolic<br>process (GO:0051171)                  | 2681 | 91 | 53,09 | + | 1,71 | 0,000817 |
| regulation of nucleic acid-<br>templated transcription<br>(GO:1903506)                | 2524 | 89 | 49,98 | + | 1,78 | 0,000224 |
| regulation of nucleobase-<br>containing compound<br>metabolic process<br>(GO:0019219) | 2568 | 91 | 50,85 | + | 1,79 | 0,000129 |
| regulation of primary<br>metabolic process<br>(GO:0080090)                            | 2896 | 94 | 57,34 | + | 1,64 | 0,00341  |

|                                                         |       |     |        |   |      |          |
|---------------------------------------------------------|-------|-----|--------|---|------|----------|
| regulation of RNA biosynthetic process (GO:2001141)     | 2524  | 89  | 49,98  | + | 1,78 | 0,000224 |
| regulation of RNA metabolic process (GO:0051252)        | 2543  | 90  | 50,35  | + | 1,79 | 0,000162 |
| regulation of transcription, DNA-templated (GO:0006355) | 2484  | 89  | 49,19  | + | 1,81 | 0,000113 |
| single-organism developmental process (GO:0044767)      | 603   | 30  | 11,94  | + | 2,51 | 0,00991  |
| Unclassified (UNCLASSIFIED)                             | 20633 | 331 | 408,56 | - | 0,81 | 0        |
